1 **Physiological characterization of nitrate ammonifying bacteria isolated from rice paddy soil via**  
2 **a newly developed high-throughput screening method**

3

4 Hokwan Heo<sup>a</sup>, Miye Kwon<sup>a</sup>, Bongkeun Song<sup>b</sup> and Sukhwan Yoon<sup>a#</sup>

5

6 <sup>a</sup>Department of Civil and Environmental Engineering, Korea Advanced Institute of Science and  
7 Technology (KAIST), Daejeon, 34141, Korea

8 <sup>b</sup>Department of Biological Sciences, Virginia Institute of Marine Science (VIMS), College of William  
9 and Mary, Gloucester Point, VA, 23062, United States

10

11 **Running Title:** Physiological characterization of soil DNRA bacteria

12

13 #Address correspondence to Sukhwan Yoon, [syoon80@kaist.ac.kr](mailto:syoon80@kaist.ac.kr)

14

15

16

17

18

19

20

21

22

23

24

25

26

27

28

29 **ABSTRACT**

30 Dissimilatory nitrate/nitrite reduction to ammonium (DNRA) has recently gained attention as a  
31 nitrogen retention pathway that may potentially be harnessed to alleviate nitrogen loss resulting from  
32 denitrification. Until recently, ecophysiology of DNRA bacteria inhabiting agricultural soils has  
33 remained largely unexplored, due to the difficulty in targeted enrichment and isolation of DNRA  
34 microorganisms. In this study, >100 microbial isolates capable of DNRA have been isolated from rice  
35 paddy soil with apparent dominance of denitrification using a novel high-throughput screening  
36 method. Six of these isolates, each assigned to a disparate genus, was examined to improve  
37 understanding of DNRA physiology. All isolates carried *nrfA* and/or *nirB*, and an isolate affiliated to  
38 *Bacillus* possessed a clade II *nosZ* gene and was capable of N<sub>2</sub>O reduction. A common prominent  
39 physiological feature observed in all DNRA isolates was NO<sub>2</sub><sup>-</sup> accumulation observed before NH<sub>4</sub><sup>+</sup>  
40 production, which was further examined with *Citrobacter* sp. DNRA3 (possessing *nrfA* and *nirB*) and  
41 *Enterobacter* sp. DNRA5 (possessing only *nirB*). In both organisms, NO<sub>2</sub><sup>-</sup>-to-NH<sub>4</sub><sup>+</sup> reduction was  
42 inhibited by submillimolar NO<sub>3</sub><sup>-</sup>, and *nrfA* or *nirB* transcription was down-regulated when NO<sub>3</sub><sup>-</sup> was  
43 being reduced to NO<sub>2</sub><sup>-</sup>. Both batch and chemostat incubations of these isolates with excess organic  
44 electron donors produced NH<sub>4</sub><sup>+</sup> from reduction of NO<sub>3</sub><sup>-</sup>; however, incubation with excess NO<sub>3</sub><sup>-</sup>  
45 resulted in NO<sub>2</sub><sup>-</sup> buildup but no substantial NH<sub>4</sub><sup>+</sup> production, presumably due to NO<sub>3</sub><sup>-</sup> presence. This  
46 previously overlooked link between NO<sub>3</sub><sup>-</sup> repression of NO<sub>2</sub><sup>-</sup>-to-NH<sub>4</sub><sup>+</sup> reduction and the C-to-N ratio  
47 regulation of DNRA activity may be a key mechanism underpinning denitrification-vs-DNRA  
48 competition in soil.

49

50 **IMPORTANCE**

51 Dissimilatory nitrate/nitrite reduction to ammonium (DNRA) is an anaerobic microbial pathway that  
52 competes with denitrification for common substrates NO<sub>3</sub><sup>-</sup> and NO<sub>2</sub><sup>-</sup>. Unlike denitrification leading to  
53 nitrogen loss and N<sub>2</sub>O emission, DNRA reduces NO<sub>3</sub><sup>-</sup> and NO<sub>2</sub><sup>-</sup> to NH<sub>4</sub><sup>+</sup>, a reactive nitrogen with  
54 higher tendency to be retained in soil matrix. Therefore, stimulation of DNRA has often been  
55 proposed as a strategy to improve fertilizer efficiency and reduce greenhouse gas emissions. Such  
56 attempts have been hampered by lack of insights into soil DNRA ecophysiology. Here, we have

57 developed a novel high-throughput screening method for isolating DNRA-catalyzing organisms from  
58 agricultural soils without apparent DNRA activity. Physiological characteristics of six DNRA isolates  
59 were closely examined, disclosing a previously overlooked link between  $\text{NO}_3^-$  repression of  $\text{NO}_2^-$ -to-  
60  $\text{NH}_4^+$  reduction and the C-to-N ratio regulation of DNRA activity, which may be key to understanding  
61 why significant DNRA activity is rarely observed in nitrogen-rich agricultural soils.

62

## 63 INTRODUCTION

64 Nitrogen is an essential element for plant growth. Today, the Haber-Bosch process, used primarily for  
65 production of nitrogen fertilizers, is singled out as the largest energy-consuming industrial process,  
66 with global energy consumption summing up to 2.5% of the total energy consumed across the globe,  
67 and naturally, is one of the largest sources of greenhouse gases (1, 2). The increased nitrogen flux in  
68 the soil and aquatic environments, as a consequence of fertilizer application to agricultural soils, has  
69 also led to aggravation of various nitrogen-related environmental problems, e.g., enrichment of  $\text{NO}_3^-$   
70 in groundwater and harmful algal blooms as a symptom of eutrophication in surface water (3). Thus,  
71 mitigation of the ‘nitrogen dilemma’ has been regarded as one of the most impending issues for  
72 environmental sustainability (4).

73

74 Despite the environmental consequences, nitrogen is not used efficiently in agroecosystems. Nitrogen  
75 fertilizer efficiency, i.e., the proportion of applied fertilizer nitrogen that eventually ends up in crop  
76 biomass rarely exceeds 40%, due to nitrogen loss via sequential nitrification and denitrification  
77 reactions (5). These microbial reactions are also the major culprits of  $\text{N}_2\text{O}$  emissions. Several different  
78 strategies have been devised to limit nitrogen loss and  $\text{N}_2\text{O}$  emissions from soil systems, including the  
79 use of nitrification inhibitors and slow-release fertilizers (6, 7). Another possible strategy recently  
80 proposed for improved soil nitrogen management is to outcompete the denitrification pathway with  
81 nitrogen-retaining DNRA (dissimilatory nitrate/nitrite reduction to ammonium) pathway (8-11). The  
82 DNRA pathway is the reduction of  $\text{NO}_3^-/\text{NO}_2^-$  to  $\text{NH}_4^+$  catalyzed by the microorganisms equipped  
83 with cytochrome  $c_{552}$  nitrite reductases (encoded by *nrfA* genes) or NADH-dependent nitrite  
84 reductases (encoded by *nirB* genes) generally perceived as assimilatory nitrite reductases (12).

85 According to current limited knowledge,  $\text{NO}_2^-$ -to- $\text{NH}_4^+$  reduction may serve as the electron acceptor  
86 reaction for respiration (respiratory DNRA) or electron dump for NADH regeneration in fermentation  
87 of complex organics (fermentative DNRA) (13-15).

88

89 Denitrification and DNRA pathways compete for common substrates,  $\text{NO}_3^-/\text{NO}_2^-$ , and thus,  
90 stimulating one would repress the other (16, 17). Previous investigations suggested that DNRA is  
91 favored in environments with high organic carbon (C) content and limiting supply of nitrogenous  
92 electron acceptors ( $\text{NO}_3^-/\text{NO}_2^-$ ) (18-20). This hypothesis was further corroborated by recent laboratory  
93 experiments with microbial enrichments and axenic microbial cultures harboring both denitrification  
94 and DNRA pathways; however, conflicting observations (e.g., in experiments with *Intrasporangium*  
95 *calvum* and the *Deltaproteobacteria*-dominated wastewater enrichments) suggest the possibility that  
96 the observed correlation between DNRA activity and the C-to-N ratio (the ratio of C in bioavailable  
97 organic compounds to N in  $\text{NO}_3^-/\text{NO}_2^-$  in this context) may be circumstantial (17, 21-23).

98

99 Microbial population responsible for DNRA in soils can now be analyzed without culturing, using  
100 recently developed molecular tools targeting *nrfA* genes or metagenomics and meta-omics techniques  
101 (24, 25). Nevertheless, these culture-independent analyses need to be complemented with culture-  
102 based examinations into physiology of soil DNRA isolates, especially so considering that the previous  
103 observations that *nrfA* abundance may be decoupled from DNRA activity and that *nirB*-possessing  
104 organisms may also contribute to the overall DNRA activity (26, 27). The difficulty in securing  
105 DNRA isolates from soils with apparent dominance of denitrification has been the bottleneck in  
106 culture-based investigation of DNRA physiology. The traditional approach that has been used for  
107 isolation of DNRA bacteria was  $\text{NO}_3^-$ -amended anoxic enrichment followed by isolation via serial  
108 dilution and/or single colony picking and screening for isolates capable of  $\text{NH}_4^+$  production from  
109 anaerobic incubation with  $\text{NO}_3^-$ . This approach would require extensive manual labor for screening out  
110 a few DNRA isolates from overwhelming number of denitrifiers when applied to soils with apparent  
111 dominance of denitrification. In fact, in the only reported case of such targeted isolation of soil DNRA  
112 organisms, only three out of 80  $\text{NO}_3^-$ -reducing isolates were revealed as capable of reducing  $\text{NO}_3^-$  to

113  $\text{NH}_4^+$  (28). Not surprisingly, the model organisms examined for DNRA ecophysiology rarely  
114 originated from soil (15, 17, 29-32). Further, most of these isolates had been aerobically isolated and  
115 cultured for decades in laboratory settings before they were recognized as being capable of DNRA.  
116 Thus, use of these isolates as representatives of soil DNRA bacteria have received criticism as lacking  
117 ecological relevance to the fate of  $\text{NO}_3^-$  in anoxic agricultural soils.

118

119 To address this ecological relevance issue in examining soil DNRA ecophysiology, a less onerous and  
120 time-consuming method for isolation of DNRA bacteria in denitrification-dominant agricultural soils  
121 was in need. Here, to address this issue, a rapid inexpensive high-throughput screening method was  
122 developed utilizing the well-established salicylate method for  $\text{NH}_4^+$  detection and quantification (33).  
123 Reductive transformation of  $\text{NO}_3^-$  was examined with six DNRA organisms isolated from rice paddy  
124 soils using this novel screening method, affiliated to *Bacillus* (belonging to *Firmicutes* phylum),  
125 *Aeromonas*, *Citrobacter*, *Enterobacter*, *Klebsiella* and *Shewanella* (belonging to *Proteobacteria*  
126 phylum) genera. Their most obvious common physiological feature was  $\text{NO}_3^-$  inhibition of  $\text{NO}_2^-$ -to-  
127  $\text{NH}_4^+$  reduction, which had been also previously observed with *nrfA*-and-*nirB*-harboring organisms  
128 *Escherichia coli* and *Bacillus vireti* (34, 35). With a series of batch and continuous culture  
129 experiments, we identified this  $\text{NO}_3^-$  repression of DNRA activity as one of the mechanisms  
130 underpinning the widely acknowledged but controversial C-to-N ratio regulation of DNRA-vs-  
131 denitrification competition.

132

## 133 **RESULTS**

134 **Isolation of DNRA bacteria from denitrification-dominant agricultural soil.** Out of 192 colonies  
135 each from the lactate- and glucose-amended rice paddy soil enrichments, both with negligible  $\text{NH}_4^+$   
136 production from  $\text{NO}_3^-$  reduction, 126 and 12 colonies tested DNRA-positive (Fig. S1). Sequencing of  
137 the 16S rRNA gene amplicons of the positive colonies (30 and 12 colonies from lactate- and glucose-  
138 amended enrichments, respectively) identified six bacterial genera: *Aeromonas*, *Bacillus*, *Shewanella*  
139 (lactate-amended), *Enterobacter*, *Klebsiella* (glucose-amended), and *Citrobacter* (both) (Fig. S2). The  
140 DNRA activities in six of these isolates, each belonging to a different genus, were further examined.

141

142 **Identification of functional genes relevant to dissimilatory nitrogen reduction.** The draft genomes  
143 of the six DNRA isolates were constructed from the HiSeq sequencing reads (the sequencing statistics  
144 presented in Table S2). The functional genes potentially relevant to turnover of reactive nitrogen species  
145 or regulation of nitrogen metabolism were then analyzed in these draft genomes (Fig. 1 and Table S3).  
146 The isolates that originated from lactate-enriched cultures all possessed *nrfA* genes encoding  $\text{NH}_4^+$ -  
147 forming cytochrome *c*<sub>552</sub> nitrite reductases, while the two isolates from glucose-enriched cultures lacked  
148 *nrfA* gene, but possessed *nirB* genes, suggesting that NirB-type nitrite reductase was responsible for  
149 dissimilatory reduction of  $\text{NO}_2^-$  to  $\text{NH}_4^+$  in these organisms. Only *Citrobacter* sp. DNRA3 possessed  
150 both *nrfA* and *nirB*. All six isolates have *napA* in their genomes, and *Citrobacter* sp. DNRA3,  
151 *Enterobacter* sp. DNRA5, and *Klebsiella* sp. DNRA6 carry *narG*, indicating the genomic potential of  
152 these organisms to reduce  $\text{NO}_3^-$  to  $\text{NO}_2^-$ . Neither *nirK* nor *nirS*, i.e., genes encoding NO-forming nitrite  
153 reductases, was present in any of the isolates; however, a clade II *nosZ* gene was identified in the draft  
154 genome of *Bacillus* sp. DNRA2, suggesting  $\text{N}_2\text{O}$ -reducing capability.

155

156  **$\text{NO}_3^-$  reduction of the candidate DNRA isolates.** Reductive transformation of  $\text{NO}_3^-$  was observed with  
157 the axenic cultures of the six candidate DNRA isolates with or without 10%  $\text{C}_2\text{H}_2$  in the headspace (Fig.  
158 2, S3, and S4). All six isolates completely reduced the initially supplemented  $\text{NO}_3^-$  to  $\text{NH}_4^+$  via  $\text{NO}_2^-$   
159 with lactate or glucose as the source of electrons. Lactate-coupled  $\text{NO}_3^-$  reduction in *Aeromonas* sp.  
160 DNRA1, *Bacillus* sp. DNRA2, *Citrobacter* sp. DNRA3, and *Shewanella* sp. DNRA4 resulted in near-  
161 stoichiometric production of  $\text{NH}_4^+$  from  $\text{NO}_3^-$ . Reduction of  $\text{NO}_3^-$  to  $\text{NH}_4^+$  was also observed in  
162 *Enterobacter* sp. DNRA5 and *Klebsiella* sp. DNRA6 grown on glucose; however, produced  $\text{NH}_4^+$  only  
163 amounted to  $36.3 \pm 1.1$  and  $32.1 \pm 0.2$   $\mu\text{moles}$ , respectively, which were less than half of nitrogen added  
164 as  $\text{NO}_3^-$ . As the cell density of the glucose-fed *Enterobacter* sp. DNRA5 and *Klebsiella* sp. DNRA6  
165 reached at least 2.5-fold higher than the lactate-consuming isolates, the missing nitrogen was likely due  
166 to assimilation. Despite the absence of *nirK* or *nirS* gene,  $\text{N}_2\text{O}$  production was observed in all of the  
167 examined isolates during  $\text{NO}_3^-$  reduction when incubated with  $\text{C}_2\text{H}_2$ . The amounts of  $\text{N}_2\text{O}$  produced  
168 varied across the isolates, ranging from  $0.40 \pm 0.06$   $\mu\text{moles N}_2\text{O-N}$  of *Shewanella* sp. DNRA4 to  $3.5 \pm 0.3$

169  $\mu\text{moles N}_2\text{O-N}$  of *Citrobacter* sp. DNRA3. In all six isolates examined, the start of  $\text{N}_2\text{O}$  production  
170 corresponded with the start of  $\text{NH}_4^+$  production, suggesting that  $\text{N}_2\text{O}$  was the byproduct of  $\text{NO}_2^-$ -to-  
171  $\text{NH}_4^+$  reduction, not  $\text{NO}_3^-$ -to- $\text{NO}_2^-$  reduction. Of the six isolates, only *Bacillus* sp. DNRA2 showed a  
172 substantially different  $\text{N}_2\text{O-N}$  time series profile when incubated without  $\text{C}_2\text{H}_2$  (Fig. S4). The absence  
173 of  $\text{N}_2\text{O}$  accumulation suggested that  $\text{N}_2\text{O}$  consumption occurred simultaneously with DNRA in this  
174 clade II *nosZ*-harboring organism.

175

176 Accumulation of  $\text{NO}_2^-$  before reduction to  $\text{NH}_4^+$  was consistently observed in all six of these isolates.  
177 Reduction of  $\text{NO}_2^-$  to  $\text{NH}_4^+$  did not commence until  $>80\%$  of  $\text{NO}_3^-$  was consumed in any of the six  
178 isolates, suggesting that NrfA- or NirB-catalyzed  $\text{NO}_2^-$ -to- $\text{NH}_4^+$  reduction was affected by changing  
179  $\text{NO}_2^-$  or  $\text{NO}_3^-$  concentrations. The DNRA reactions of *Citrobacter* sp. DNRA3 and *Enterobacter* sp.  
180 DNRA5 were further investigated to identify whether possible causality exists between  $\text{NO}_2^-$  or  $\text{NO}_3^-$   
181 concentration and DNRA activity (Fig. 3A-B). Transcription levels of *nrfA* in *Citrobacter* sp. DNRA3  
182 and *nirB* in *Enterobacter* sp. DNRA5 were significantly higher ( $p<0.05$ ) after  $\text{NO}_3^-$  was depleted than  
183 before. Transcription of *nrfA* in *Citrobacter* sp. DNRA3 increased significantly ( $p<0.05$ ) from  $1.0\pm 0.6$   
184 *nrfA/recA* at  $t=9$  h ( $0.16\pm 0.03$  mM  $\text{NO}_3^-$  and  $0.82\pm 0.03$  mM  $\text{NO}_2^-$  remaining) to  $6.3\pm 0.2$  *nrfA/recA* at  
185  $t=15$  h ( $0.33\pm 0.08$  mM  $\text{NO}_2^-$  remaining). No significant change was observed with *nirB* transcription  
186 ( $2.04\pm 0.19$  *nirB/recA* at  $t=9$  h and  $1.61\pm 0.37$  *nirB/recA* at  $t=15$  h), suggesting that NirB-type nitrite  
187 reductase was irrelevant to respiratory DNRA. Transcription of *nirB* in *Enterobacter* sp. DNRA5  
188 followed a similar trend with that of *nrfA* in *Citrobacter* sp. DNRA3, increasing significantly after  
189 depletion of  $\text{NO}_3^-$  ( $p<0.05$ ). Substrate ( $\text{NO}_2^-$ ) regulation of transcription was unlikely for either *nrfA* in  
190 *Citrobacter* sp. DNRA3 and *nirB* in *Enterobacter* sp. DNRA5, as the transcriptions of these genes  
191 appeared unresponsive to elevated  $\text{NO}_2^-$  concentrations, as long as  $\text{NO}_3^-$  was present in the medium at  
192  $>0.15$  mM. Thus,  $\text{NO}_3^-$  concentration was the most probable environmental factor that affected the  
193 transcription of the genes encoding these DNRA-catalyzing nitrite reductases. The significant  
194 differences in the rates of  $\text{NO}_2^-$  reduction measured with *Citrobacter* sp. DNRA3 or *Enterobacter* sp.  
195 DNRA5 cells harvested before and after the  $\text{NO}_3^-$  depletion and treated with chloramphenicol also

196 supported that expression of the  $\text{NH}_4^+$ -forming nitrite reductases were down-regulated by the presence  
197 of  $\text{NO}_3^-$  (Fig. 3C-F). *Citrobacter* sp. DNRA3 cells extracted before  $\text{NO}_3^-$  depletion did not exhibit  
198 significant  $\text{NO}_2^-$  reduction activity, while the cells extracted after  $\text{NO}_3^-$  depletion readily reduced  $\text{NO}_2^-$   
199 at a rate of  $170 \pm 13 \mu\text{moles s}^{-1} \text{mg protein}^{-1}$ .  $\text{NO}_2^-$  reduction by *Enterobacter* sp. DNRA5 cells was  
200 also ~6 times higher with the cells harvested after  $\text{NO}_3^-$  depletion ( $101 \pm 10 \mu\text{moles s}^{-1} \text{mg protein}^{-1}$ )  
201 than the cells harvested before  $\text{NO}_3^-$  depletion ( $17.2 \pm 5.7 \mu\text{moles s}^{-1} \text{mg protein}^{-1}$ ;  $p < 0.05$ ).

202

203 In the resting-cell experiments with 2 mM  $\text{NO}_3^-$  added to chloramphenicol-treated *Citrobacter* sp.  
204 DNRA3 cells harvested after  $\text{NO}_3^-$  depletion,  $\text{NO}_2^-$  accumulated up to  $1.93 \pm 0.04 \text{ mM}$  at a rate of  
205  $422 \pm 8 \mu\text{moles s}^{-1} \text{mg protein}^{-1}$  before it was consumed at a rate of  $51.4 \pm 5.3 \mu\text{moles s}^{-1} \text{mg protein}^{-1}$   
206 (Fig. 3E). The negligible  $\text{NO}_2^-$  reduction activity before  $\text{NO}_3^-$  depletion suggested an additional  $\text{NO}_3^-$ -  
207 mediated inhibitory mechanism on NrfA-type nitrite reductase activity apart from transcriptional  
208 regulation of *nrfA* gene. Such repression of  $\text{NO}_2^-$  reduction activity by  $\text{NO}_3^-$  presence was not  
209 observed in the parallel experiment performed with *Enterobacter* sp. DNRA5 lacking *nrfA* and  
210 presumably utilizing NirB-type nitrite reductase (Fig. 3F).

211

212 **DNRA reaction at varying C-to-N ratios: batch and continuous cultivation.** *Citrobacter* sp.

213 DNRA3 and *Enterobacter* sp. DNRA5 were grown in batch and continuous cultures, each with two  
214 different C-to-N ratios, and  $\text{NO}_3^-$  reduction was monitored to investigate whether the generally  
215 perceived positive correlation between C-to-N ratio and DNRA activity may be related to the  $\text{NO}_3^-$ -  
216 repression of  $\text{NO}_2^-$ -to- $\text{NH}_4^+$  reduction (Fig. 4 and 5). When grown at the initial C-to-N ratio of 75 in  
217 batch cultures, *Citrobacter* sp. DNRA3 produced  $\text{NH}_4^+$  from  $\text{NO}_3^-$  reduction, and each addition of 20  
218  $\mu\text{moles NO}_3^-$  resulted in near-stoichiometric turnover to  $\text{NH}_4^+$ . Contrastingly, *Citrobacter* sp. DNRA3  
219 grown at the initial C-to-N ratio of 0.3 did not result in significant increase in  $\text{NH}_4^+$  concentration, but  
220 led to stoichiometric  $\text{NO}_2^-$  accumulation, as  $\text{NO}_3^-$  reduction produced  $0.87 \pm 0.06 \text{ mM NO}_2^-$  when the  
221 initial reaction stopped at  $t=16 \text{ h}$  due to depletion of lactate. Reduction of  $\text{NO}_3^-$  to  $\text{NO}_2^-$  resumed after  
222 replenishment with 0.2 mM lactate at  $t=21 \text{ h}$ . At this low C-to-N ratio incubation condition,  $\text{NO}_3^-$  was



223 present in the culture medium throughout incubation, and the presence of  $\text{NO}_3^-$  was likely the reason  
224 for the absence of *sensu stricto* DNRA activity.

225

226 *Enterobacter* sp. DNRA5, incubated on glucose at the C-to-N ratio of 75 produced significant amount  
227 of  $\text{NH}_4^+$  only after initially added glucose ( $2.19 \pm 0.8$  mM) was fully consumed, suggesting that  
228 substantial portions of  $\text{NO}_3^-$  and its reduction products,  $\text{NO}_2^-$  and  $\text{NH}_4^+$ , were assimilated. Upon third  
229 addition of 0.2 mM  $\text{NO}_3^-$ , with no glucose remaining in the medium, the sequential  $\text{NO}_3^-$ -to- $\text{NO}_2^-$ -to-  
230  $\text{NH}_4^+$  reduction was stoichiometric, suggesting that NirB-catalyzed  $\text{NO}_2^-$ -to- $\text{NH}_4^+$  reduction was  
231 coupled to oxidation of the fermentation products. At the low C-to-N ratio, where the culture medium  
232 was replenished with 0.1 mM glucose upon halt in  $\text{NO}_3^-$  reduction, the time series profiles of the N-  
233 species concentrations were indistinguishable from that of *Citrobacter* sp. DNRA3, save for the  
234 imperfect stoichiometry between consumed  $\text{NO}_3^-$  and produced  $\text{NO}_2^-$  and the modest, albeit  
235 significant, increase in  $\text{NH}_4^+$  concentration from  $0.07 \pm 0.01$  mM at  $t=0$  h to  $0.19 \pm 0.01$  mM at  $t=72$  h.  
236 The modest production of  $\text{NH}_4^+$  was in line with the reduced, but still significant  $\text{NO}_2^-$  reduction rate  
237 observed in the resting-cell cultures of *Enterobacter* sp. DNRA5 extracted before  $\text{NO}_3^-$  depletion.

238

239 The continuous culture of *Citrobacter* sp. DNRA3 fed medium carrying 10 mM lactate and 2 mM  
240  $\text{NO}_3^-$  (C-to-N ratio of 15), after attaining steady state, contained  $1.68 \pm 0.09$  mM  $\text{NH}_4^+$  as the only  
241 dissolved inorganic nitrogen, indicating that  $\text{NO}_3^-$  and  $\text{NO}_2^-$  were readily reduced in the chemostat.  
242 When the reactor was fed the medium carrying 0.2 mM lactate and 2 mM  $\text{NO}_3^-$  (C-to-N ratio of 0.3),  
243  $1.41 \pm 0.04$  mM  $\text{NO}_3^-$  remained in the medium at steady state, due to carbon limitation. That  $\text{NO}_2^-$  was  
244 the major product of  $\text{NO}_3^-$  reduction ( $0.58 \pm 0.04$  mM at steady state) and  $\text{NH}_4^+$  concentration did not  
245 significantly differ from the concentration in the fresh medium ( $p > 0.05$ ) indicated DNRA did not  
246 proceed further than  $\text{NO}_2^-$ . Similarly, with *Enterobacter* sp. DNRA5, significant  $\text{NH}_4^+$  formation was  
247 observed only in the continuous culture operated at the electron-acceptor-limiting condition, i.e., at C-  
248 to-N ratio of 15. The steady state  $\text{NH}_4^+$  concentration was  $0.95 \pm 0.04$  mM in this chemostat. In the  
249 continuous culture operated at electron-donor-limiting condition,  $\text{NO}_2^-$  was the only dissolved

250 nitrogen species with significantly higher concentration than the influent medium. Production of N<sub>2</sub>O  
251 (2.07±0.24 μmoles hr<sup>-1</sup>) was observed only in the high C-to-N chemostat of *Enterobacter* sp. DNRA5.  
252 The absence of significant NO<sub>2</sub><sup>-</sup>-to-NH<sub>4</sub><sup>+</sup> reduction at the low C-to-N-ratio batch and chemostat  
253 cultures, regardless mediated by NrfA-type or NirB-type nitrite reductase, could be best explained as  
254 the inhibitory effect of NO<sub>3</sub><sup>-</sup>.

255

## 256 **DISCUSSION**

257 For long, DNRA has been recognized as one of the key reactions determining the fate of reactive  
258 nitrogen in the environment (36-38). Recovery of <sup>15</sup>NH<sub>4</sub><sup>+</sup> from <sup>15</sup>NO<sub>3</sub><sup>-</sup> reduction in both *in situ* column  
259 studies and *ex situ* soil incubation experiments supported that the DNRA pathway is a significant  
260 dissimilatory reaction pathway in soil environments; however, fertilized agricultural soils with the  
261 DNRA pathway dominating over the denitrification pathway, i.e., with higher NH<sub>4</sub><sup>+</sup> production than  
262 N<sub>2</sub>O+N<sub>2</sub> production from NO<sub>3</sub><sup>-</sup>/NO<sub>2</sub><sup>-</sup> reduction, have rarely been reported (8, 16, 39). Thus, few  
263 attempts have been made to isolate and examine DNRA organisms from agricultural soils, and  
264 interpretations of DNRA in ecological contexts, particularly with regards to the fate of fertilizer N,  
265 have relied on extrapolation of findings from experiments with limited number of isolates, most, if not  
266 all, acquired from non-soil environments (15, 17, 28, 32, 34, 40). The high-throughput DNRA  
267 screening method developed in this study enabled easy and rapid targeted isolation by systematically  
268 combining widely-used culturing and colorimetric detection techniques. The most conspicuous  
269 benefit of the method is the ease of isolating the DNRA organisms that had been considered to be  
270 difficult to enrich from soils with apparent domination of denitrification over DNRA. Examination of  
271 the physiology of the indigenous DNRA organisms in denitrification-dominant soils, isolated using  
272 this targeted isolation technique, would be a sensible approach to investigate the reasons why NH<sub>4</sub><sup>+</sup>  
273 production via DNRA is often underrepresented in the nitrogen cycling of agricultural soils. Such  
274 knowledge would be immensely useful in developing soil management techniques for enhancing the  
275 nitrogen-retaining DNRA pathway (9, 39).

276

277 The newly acquired soil DNRA isolates were assigned to six genera according to their 16S rRNA  
278 gene sequences. Several of these genera have been previously confirmed to include strains capable of  
279 carrying out DNRA (*Bacillus*, *Citrobacter*, *Enterobacter*, and *Klebsiella*). The list also included a  
280 genus that has not yet been previously isolated from soil environments (*Shewanella*) and a genus  
281 without physiologically confirmed DNRA activity (*Aeromonas*) (27, 41-43). The genomic analyses of  
282 these phylogenetically diverse DNRA-catalyzing isolates confirmed that the possession of *nrfA* or  
283 *nirB* is necessary for DNRA phenotype (32, 34). All four isolates utilizing lactate as the electron  
284 donor were *nrfA* genotype. *Enterobacter* sp. DNRA5 and *Klebsiella* sp. DNRA6 lacking *nrfA* failed to  
285 grow on lactate at  $\text{NO}_2^-$ -reducing condition, suggesting that NrfA-type nitrite reductase is needed for  
286 respiratory  $\text{NO}_2^-$  reduction to  $\text{NH}_4^+$ . Thus, physiological functions of NirB-catalyzed  $\text{NO}_2^-$ -to- $\text{NH}_4^+$   
287 reduction in these organisms may be  $\text{NAD}^+$  regeneration for fermentation, detoxification of  $\text{NO}_2^-$ ,  
288 and/or assimilatory reduction, as previously suggested (14, 32). Neither *nirS* nor *nirK* was found in  
289 any of the sequenced draft genomes; however, a *nosZ* gene was recovered in the genomes of the *nrfA*-  
290 possessing *Bacillus* sp. DNRA2. Incubations on  $\text{NO}_3^-$  reduction with and without  $\text{C}_2\text{H}_2$  confirmed  
291  $\text{N}_2\text{O}$  reduction activity in this isolate amid active DNRA, which was probably catalyzed by the NosZ  
292 encoded by this gene.

293

294 The most easily recognizable common phenotype of the DNRA isolates was  $\text{NO}_2^-$  accumulation  
295 before  $\text{NH}_4^+$  production suggesting  $\text{NO}_3^-$  repression of  $\text{NO}_2^-$ -to- $\text{NH}_4^+$  reduction. This phenotype has  
296 been consistently observed in previously studied DNRA bacteria (34, 35, 44). These previous studies  
297 attributed the  $\text{NO}_3^-$ -induced repression to transcriptional regulation involving  $\text{NO}_3^-$  sensor proteins  
298 NarQ and NarX, and the transcript abundances of *nrfA* in *Escherichia coli*, and both *nrfA* and *nirB* in  
299 *B. vireti* were significantly lower when supplied with higher  $\text{NO}_3^-$  concentrations. In agreement with  
300 these previous studies, *nrfA* in *Citrobacter* sp. DNRA3 and *nirB* in *Enterobacter* sp. DNRA5,  
301 exhibited at least 5.8-fold higher transcription after  $\text{NO}_3^-$  depletion than before ( $p < 0.05$ ). Further, the  
302 results from the resting-cell experiments with these isolates showed clear indications that the presence  
303 of  $\text{NO}_3^-$  at sub-millimolar concentration was sufficient to inhibit activities of expressed NrfA-type  
304 nitrite reductase. Whether the apparent inhibition was due to the redirection of electron flow

305 analogous to what was observed with NosZ-catalyzed N<sub>2</sub>O reduction in presence of O<sub>2</sub> or inhibition  
306 of NrfA enzyme itself, however, cannot be determined and is outside the scope of the current study  
307 (45). In denitrifiers, such NO<sub>3</sub><sup>-</sup>-mediated repression of dissimilatory NO<sub>2</sub><sup>-</sup> reduction, either via  
308 transcription regulation or enzyme inhibition, has not yet been reported, and near-stoichiometric NO<sub>2</sub><sup>-</sup>  
309 accumulation during NO<sub>3</sub><sup>-</sup> reduction has been observed only as isolated cases (46-48). Therefore, as  
310 long as NO<sub>3</sub><sup>-</sup> is present in soil matrices harboring diverse denitrifiers and DNRA-catalyzing  
311 organisms, NO<sub>2</sub><sup>-</sup> produced from NO<sub>3</sub><sup>-</sup> would be reduced mostly to N<sub>2</sub>O and N<sub>2</sub> via denitrification, with  
312 DNRA phenotype remaining silent.

313

314 The environmental physicochemical parameter that has been most frequently associated with DNRA  
315 activity is the C-to-N ratio. Multiple experimental evidences from culture-based experiments and field  
316 measurements have supported that DNRA is favored at high C-to-N ratios, i.e., electron acceptor  
317 limiting condition, while denitrification is favored at low C-to-N ratios, i.e., electron donor limiting  
318 condition (17, 19, 22). The observations from the incubation of the two isolates at the two different C-  
319 to-N ratios indicated that the NO<sub>3</sub><sup>-</sup> repression of NO<sub>2</sub><sup>-</sup>-NH<sub>4</sub><sup>+</sup> reduction activity may actually be directly  
320 linked to this C-to-N ratio regulation of DNRA activity in the environment. The C-to-N ratio of soils  
321 or sediments are often inversely related to the NO<sub>3</sub><sup>-</sup> contents (49). In the soils with low C-to-N ratios,  
322 the NO<sub>2</sub><sup>-</sup>-to-NH<sub>4</sub><sup>+</sup> reduction may thus be deactivated in the DNRA-catalyzing organisms due to the  
323 high NO<sub>3</sub><sup>-</sup> contents while NO<sub>2</sub><sup>-</sup>-to-N<sub>2</sub>O/N<sub>2</sub> reduction activity remains intact in denitrifiers cohabiting  
324 the ecological niches. Even with abundant DNRA-catalyzing population, N<sub>2</sub>O and N<sub>2</sub> would still be  
325 the dominant terminal product of NO<sub>3</sub><sup>-</sup> reduction in such soils. Thus, what was previously regarded as  
326 the effect of the C-to-N ratio on the denitrification-vs-DNRA competition may be, at least in part,  
327 explained as the consequence of NO<sub>3</sub><sup>-</sup> inhibition of *sensu stricto* DNRA (39).

328

329 Production of N<sub>2</sub>O has been consistently observed in non-denitrifying organisms with DNRA  
330 phenotypes, with recovery of up to ~50% of NO<sub>3</sub><sup>-</sup>-N as N<sub>2</sub>O-N (28, 32, 44, 50). Likewise, all DNRA-  
331 catalyzing isolates examined in this study produced N<sub>2</sub>O during the course of NO<sub>3</sub><sup>-</sup> reduction to NH<sub>4</sub><sup>+</sup>  
332 despite the absence of *nirS* or *nirK* gene in their genomes. Hypotheses surrounding the mechanisms of

333 N<sub>2</sub>O production from DNRA have invariably involved NO (32, 35, 44). Considering that *norB*, *norV*,  
334 and/or *hmp* genes were identified in the genomes of DNRA isolates, it is plausible to regard NO as the  
335 precursor of N<sub>2</sub>O in these organisms; however, the mechanism leading to NO production from NO<sub>3</sub><sup>-</sup>  
336 or NO<sub>2</sub><sup>-</sup> remains unclear. The absence of N<sub>2</sub>O production before NO<sub>3</sub><sup>-</sup> depletion in all six isolates  
337 suggested against involvement of NapA- or NarG-type nitrate reductases. The more plausible source  
338 of NO would be NO<sub>2</sub><sup>-</sup>-to-NH<sub>4</sub><sup>+</sup> reduction by NrfA- and NirB-type nitrite reductases, although reaction  
339 mechanism leading to formation of NO as a byproduct has not been elucidated for either enzyme (44,  
340 51). The results from the chemostat experiments with *Enterobacter* sp. DNRA5 further support this  
341 hypothesis, as detectable N<sub>2</sub>O production was observed only at the high C-to-N ratio operating  
342 condition where active NO<sub>2</sub><sup>-</sup>-to-NH<sub>4</sub><sup>+</sup> reduction occurred.

343

344 Another noteworthy observation regarding N<sub>2</sub>O production by the DNRA-catalyzing organisms was  
345 the absence of detectable N<sub>2</sub>O production in the NH<sub>4</sub><sup>+</sup>-producing *Citrobacter* sp. DNRA3 chemostat  
346 (high C-to-N ratio), which suggested that the NO<sub>3</sub><sup>-</sup> or NO<sub>2</sub><sup>-</sup> concentrations in the surrounding  
347 environment may have positive correlation with N<sub>2</sub>O formation by *nrfA*-possessing organisms. In line  
348 with this observation, elevated N<sub>2</sub>O production upon incubations with media with lower C:N ratios,  
349 i.e., higher NO<sub>3</sub><sup>-</sup> concentration, was previously observed in *nrfA*-utilizing isolates of *Citrobacter* and  
350 *Bacillus* genera (28). Together with the finding that *Bacillus* sp. DNRA2 actively consumed N<sub>2</sub>O  
351 simultaneously with NO<sub>2</sub><sup>-</sup>-to-NH<sub>4</sub><sup>+</sup> reduction, this observation suggests that N<sub>2</sub>O produced from  
352 NrfA-mediated DNRA may be negligible in complex soil microbiomes.

353

## 354 MATERIALS AND METHODS

355 **Soil sampling and initial characterization.** The agricultural soil used in this study was sampled  
356 from an experimental rice paddy field located at Chungnam National University (CNU) agricultural  
357 research site in Daejeon, Korea (36°22'01.6"N 127°21'14.3"E) in October 2018. Harvesting had been  
358 complete and there was no standing water at the time of sampling. Cover soil and plant materials were  
359 carefully removed before sampling and approximately 1 kg of soil at 5 to 30 cm depth from the  
360 surface was collected with a stainless tubular soil sampler with an inner diameter of 2 cm. The

361 sampled soils were transported to the laboratory in coolers filled with ice and stored at 4°C until use.  
362 The physico-chemical characteristics of this soil, including the pH, textures, and total carbon and  
363 nitrogen contents were analyzed using standardized protocols.  
364  
365 **Culture medium and growth conditions.** The minimal salts medium (MSM) for enrichment,  
366 isolation, and cultivation of soil DNRA bacteria was prepared by adding, per L of deionized distilled  
367 water, 10 mmoles NaCl, 3.24 mmoles Na<sub>2</sub>HPO<sub>4</sub>, 1.76 mmoles KH<sub>2</sub>PO<sub>4</sub>, 0.1 mmoles NH<sub>4</sub>Cl, and 1 mL  
368 of 1000x trace element stock solution (52). For enrichment and isolation, R2A broth (Kisanbio, Seoul,  
369 Korea) was added to the medium as growth supplements. To minimize the interference of NH<sub>4</sub><sup>+</sup>  
370 derived from mineralization of organic nitrogen in the ensuing DNRA-screening process, R2A broth  
371 concentration in the medium was limited to 6.2 mg L<sup>-1</sup>. The pH of the medium was adjusted to 7.0.  
372 Pure-culture incubation and experiments were performed with 100 mL medium dispensed to 160-mL  
373 serum vials. The serum bottles were flushed with N<sub>2</sub> gas (≥99.999%, Special Gas Inc., Daejeon,  
374 Korea) for 10 min and sealed with black butyl-rubber stoppers (Geo-Microbial Technologies, Inc.,  
375 Ochelata, OK) and crimped with aluminum crimp seals before autoclaving. The degassed filter-  
376 sterilized 200X vitamin stock solution was then added to the medium (52). Immediately before  
377 inoculation, sodium lactate or glucose was added as the electron donor and organic carbon source and  
378 KNO<sub>3</sub> as the electron acceptor. Lactate and glucose were chosen as the non-fermentable and  
379 fermentable electron donors, respectively, as both substrates had been previously reported to support  
380 DNRA reactions (17, 53, 54). Enrichment with acetate as the electron donor was also attempted, but  
381 failed to yield any DNRA-positive isolates. Thus, acetate was not further considered as a potential  
382 electron donor in this study. The culture bottles were incubated with shaking at 150 rpm in dark at  
383 room temperature (25°C). Agar plates were prepared by adding 15 g L<sup>-1</sup> Bacto™ Agar (Becton  
384 Dickinson, Franklin Lakes, NJ) to the liquid medium prepared with elevated concentrations of KNO<sub>3</sub>  
385 (12 mM) and sodium lactate or glucose (120 mM as C). The 96-well plates for DNRA-screening were  
386 prepared by distributing 200-μL aliquots of the prepared culture medium to the wells in a UV-  
387 sterilized 96-well clear flat bottom microplates (Corning Inc., Corning, NY). Agar plate and 96-well

388 plate were prepared and incubated in an anaerobic chamber (Coy Laboratory Products, Inc., Grass  
389 Lake, MI) with atmosphere consisting of 96% N<sub>2</sub> and 4% H<sub>2</sub>.

390

391 **High-throughput DNRA phenotype screening.** A simple novel high-throughput screening method  
392 was developed in this study for isolating DNRA-catalyzing organisms from agricultural soils without  
393 apparent DNRA activity (Fig. 6). Anoxic soil enrichments were prepared in 250-mL Erlenmeyer  
394 flasks (Duran Group, Wertheim, Germany) in the anaerobic chamber. The rice paddy soil was  
395 suspended at 1:10 w/v soil-to-medium ratio in 200 mL MSM amended with 2 mM KNO<sub>3</sub> and 6.67  
396 mM sodium lactate or 3.33 mM glucose (20 mM total C concentration) and incubated for two weeks  
397 in dark without shaking. The aqueous NO<sub>3</sub><sup>-</sup>-N, NO<sub>2</sub><sup>-</sup>-N, and NH<sub>4</sub><sup>+</sup>-N concentrations were measured to  
398 confirm depletion of the electron acceptors and to check the extent of DNRA reaction in the  
399 enrichments. Serial dilutions of the soil enrichment cultures were spread onto agar plates, and after  
400 incubation in the anaerobic chamber, single colonies were picked to inoculate the 96-well plates  
401 loaded with fresh medium containing 1 mM NO<sub>3</sub><sup>-</sup> and 3.34 mM lactate or 1.67 mM glucose. The  
402 inoculated 96-well plates were covered with an optical adhesive cover (Applied Biosystems, Foster  
403 City, CA) to prevent contamination and evaporation of the culture medium and incubated for a week.

404

405 After incubation, 100 µL of the 200-µL culture in each well was transferred to its corresponding  
406 position on a new 96-well plate. The absorbances at 600 nm, 660 nm, and 540 nm were determined  
407 using a Sunrise microplate reader (Tecan, Männedorf, Switzerland) with one of the duplicated plates  
408 to measure the possible interference of cell turbidity to the colorimetric determination of inorganic  
409 nitrogen concentrations. This plate was used for screening of the wells with increased NH<sub>4</sub><sup>+</sup>  
410 concentrations indicative of DNRA activity, using salicylate-nitroprusside chemistry. To each well,  
411 80 µL of the color reagent (containing 0.2 M sodium hydroxide, 1 M sodium salicylate and 5.88 mM  
412 sodium nitroprusside dihydrate) and 20 µL of 5.1 mM sodium dichloroisocyanurate solution were  
413 sequentially added. The absorbance at 660 nm was measured after 30-minute incubation at 25°C, and  
414 the wells with OD<sub>660nm</sub> values higher than 1.6 (equivalent to 0.8 mM NH<sub>4</sub><sup>+</sup>) after subtracting OD<sub>660nm</sub>

415 resulting from cell turbidity were considered as positives. The duplicated 96-well plate was used for  
416 sequential measurements of  $\text{NO}_2^-$ -N and  $\text{NO}_3^-$ -N (55). The Griess reagent was added to each well to a  
417 total volume of 200- $\mu\text{L}$  and the absorbance at 540 nm was measured after 30 min of incubation at  
418 25°C for determination of  $\text{NO}_2^-$ -N concentration. The  $\text{NO}_3^-$ -N concentration was determined after the  
419 initial Griess assay. After reducing  $\text{NO}_3^-$  to  $\text{NO}_2^-$  by adding per well 20  $\mu\text{L}$  of 1% w/v vanadium(III)  
420 chloride ( $\text{VCl}_3$ ; Sigma-Aldrich) prepared in 1 M HCl aqueous solution, the absorbance at 540 nm was  
421 measured to obtain the  $\text{NO}_3^-$ -plus- $\text{NO}_2^-$  concentration, from which the  $\text{NO}_2^-$  concentration was  
422 subtracted. The colonies corresponding to the wells with  $\text{NH}_4^+$  concentrations higher than 0.8 mM and  
423 absence of  $\text{NO}_2^-$  and  $\text{NO}_3^-$  were transferred to gridded fresh agar plates and stored at 4°C until use.

424

425 **Characterization of DNRA isolates.** The partial 16S rRNA genes of these candidate DNRA isolates  
426 were amplified with the 27F/1492R primer set and sequenced to identify their phylogenetic  
427 affiliations (GenBank accession number: MT426123-64). Based on these initial 16S rRNA  
428 sequencing data, one isolate per genus was selected and subjected to further analyses. The DNRA  
429 activity of each isolate was confirmed by incubating the isolate with  $\text{NO}_3^-$  as the sole electron  
430 acceptor in 100 mL MSM in 160-mL serum bottle with and without 10% v/v  $\text{C}_2\text{H}_2$  in the anoxic  $\text{N}_2$   
431 headspace.  $\text{C}_2\text{H}_2$  inhibits  $\text{N}_2\text{O}$  reduction by NosZ, thus enabling observation of  $\text{N}_2\text{O}$  production from  
432  $\text{NO}_3^-$  and/or  $\text{NO}_2^-$  reduction in a NosZ-harboring organism (56). The changes to the dissolved  
433 concentrations of  $\text{NO}_3^-$ -N,  $\text{NO}_2^-$ -N, and  $\text{NH}_4^+$ -N, headspace concentrations of  $\text{N}_2\text{O}$ , and the microbial  
434 growth ( $\text{OD}_{600\text{nm}}$ ) were monitored until no further change was observed.

435

436 After incubation, culture sample was collected from each of these six DNRA-positive isolates and the  
437 genomic DNA was extracted using the DNeasy<sup>®</sup> Blood & Tissue Kit (Qiagen, Hilden, Germany)  
438 according to the manufacturer's protocol. Genome sequencing was performed using the HiSeq4000  
439 platform (Illumina, San Diego, CA) at Macrogen Inc. (Seoul, Korea). Quality trimming and removal  
440 of adapter sequences from raw reads was performed using Cutadapt v2.9 and *de novo* assembly using  
441 SPAdes (v3.14.0) with the minimum contig length set to 200 bp (57, 58). The quality of the draft



442 genomes was assessed using the CheckM software v1.0.18 (59). The NCBI Prokaryotic Genome  
443 Annotation Pipeline (PGAP) was used for genome annotation (60). The presence or absence of the  
444 nitrogen dissimilation functional genes was double-checked by running *hmmsearch* command of the  
445 HMMER software package v3.1b1 with the hidden Markov models (HMM) downloaded from the  
446 FunGene database (<http://fungene.cme.msu.edu/>) accessed on 10/14/2019 (61). This process ensured  
447 that the missing genes were not due to incompleteness of the draft genomes. The genes encoding the  
448 regulatory proteins putatively involved in nitrogen dissimilation were also searched for in the  
449 annotated genome. The draft genome sequences of the six isolates were deposited to the NCBI's  
450 GenBank database (accession numbers: JABAIU000000000, JABAIT000000000,  
451 JABAIS000000000, JABAIR000000000, JABAIQ000000000, and JABAIP000000000).

452  
453 **NO<sub>3</sub><sup>-</sup> inhibition of NO<sub>2</sub><sup>-</sup>-to-NH<sub>4</sub><sup>+</sup> reduction.** *Citrobacter* sp. DNRA3 carrying single copies of *nrfA*  
454 and *nirB* genes and *Enterobacter* sp. DNRA5 carrying *nirB* genes were selected to further examine  
455 whether and how NO<sub>3</sub><sup>-</sup> affect NO<sub>2</sub><sup>-</sup>-to-NH<sub>4</sub><sup>+</sup> reduction. The resting-cell NO<sub>3</sub><sup>-</sup> and NO<sub>2</sub><sup>-</sup> reduction  
456 activities were examined with the cells harvested from the two distinct phases of DNRA reaction, i.e.,  
457 NO<sub>3</sub><sup>-</sup>-to-NO<sub>2</sub><sup>-</sup> and NO<sub>2</sub><sup>-</sup>-to-NH<sub>4</sub><sup>+</sup> reduction. The DNRA-catalyzing isolates were grown with 5 mM  
458 NO<sub>3</sub><sup>-</sup> as the electron acceptor and 40 mM lactate or 10 mM glucose as the electron donor and carbon  
459 source. The cells were harvested before and after NO<sub>3</sub><sup>-</sup> depletion. Cell pellets were collected by  
460 centrifuging 200-mL culture at 10,000Xg for 20 min at 4°C, and re-suspended in 10 mL MSM. One  
461 milliliter of the cell suspension was added to a 160-mL stopper-sealed serum vial containing 100-mL  
462 of fresh MSM with N<sub>2</sub> headspace. Chloramphenicol (water-soluble; Sigma-Aldrich) was added to the  
463 final concentration of 25 µg mL<sup>-1</sup> to arrest *de novo* protein synthesis (62). These cell suspensions were  
464 then amended with 2 mM NO<sub>3</sub><sup>-</sup> or NO<sub>2</sub><sup>-</sup> and 6.67 mM lactate (*Citrobacter* sp. DNRA3) or 3.34 mM  
465 glucose (*Enterobacter* sp. DNRA5). The rates of change in the amounts of NO<sub>2</sub><sup>-</sup> were measured and  
466 normalized with the protein mass of the resting-cell cultures.

467

468 To observe the effects of changing NO<sub>3</sub><sup>-</sup> and NO<sub>2</sub><sup>-</sup> concentrations on transcriptional expression of the  
469 nitrite reductase genes directly relevant to DNRA, transcript abundances of *nrfA* and *nirB* genes in

470 *Citrobacter* sp. DNRA3 and *nirB* gene in *Enterobacter* sp. DNRA5 were monitored as the cells were  
471 grown with 1 mM NO<sub>3</sub><sup>-</sup> and 3.34 mM lactate or 1.67 mM glucose. Collection and treatment of the  
472 samples, including extraction, purification, and reverse transcription processes, were performed using  
473 established protocols (17). Quantitative polymerase chain reaction was performed with a QuantStudio  
474 3 Real-Time PCR instrument (Thermo Fisher Scientific, Waltham, MA) using SYBR Green detection  
475 chemistry, targeting *nrfA* and *nirB* in *Citrobacter* sp. DNRA3 and *nirB* in *Enterobacter* sp. DNRA5,  
476 as described in detail in the supplemental material.

477

#### 478 **Batch and chemostat incubation of the DNRA-catalyzing isolates with varying C-to-N ratios.**

479 Batch cultures of *Citrobacter* sp. DNRA3 and *Enterobacter* sp. DNRA5 were prepared with two  
480 different C (carbon in the organic electron donor)-to-N (nitrogen in NO<sub>3</sub><sup>-</sup>) ratios, and DNRA reaction  
481 was observed in these vessels. For high-C-to-N incubation, the culture medium was initially prepared  
482 with 0.2 mM NO<sub>3</sub><sup>-</sup> and 5 mM lactate or 2.5 mM glucose, and after each NO<sub>3</sub><sup>-</sup>/NO<sub>2</sub><sup>-</sup> depletion event,  
483 the culture vessels were amended with an additional batch of 0.2 mM NO<sub>3</sub><sup>-</sup>. For low-C-to-N  
484 incubation, the initial medium contained 2 mM NO<sub>3</sub><sup>-</sup> and 0.2 mM lactate or 0.1 mM glucose, and the  
485 organic electron donors were replenished upon depletion, indicated by discontinued NO<sub>3</sub><sup>-</sup> reduction.  
486 The concentrations of NO<sub>3</sub><sup>-</sup>, NO<sub>2</sub><sup>-</sup>, and NH<sub>4</sub><sup>+</sup> were monitored throughout the incubation periods.

487

488 The chemostat cultures of the DNRA isolates were set up with 300-mL culture in continuously stirred  
489 620-mL glass reactor fed fresh medium at a dilution rate of 0.05 h<sup>-1</sup> (Fig. S5). The medium bottle and  
490 the reactor vessel were consistently purged with N<sub>2</sub> gas to maintain anoxic culture conditions during  
491 incubation. The reactor was operated with high (10 mM lactate or 5 mM glucose and 2 mM NO<sub>3</sub><sup>-</sup> in  
492 the feed) and low (0.2 mM lactate or 0.1 mM glucose and 2 mM NO<sub>3</sub><sup>-</sup>) C-to-N ratios. The  
493 concentrations of NO<sub>2</sub><sup>-</sup>, NO<sub>3</sub><sup>-</sup>, and NH<sub>4</sub><sup>+</sup> in the effluent was monitored until the reactor reached steady  
494 state, as indicated by three statistically similar NO<sub>2</sub><sup>-</sup>, NO<sub>3</sub><sup>-</sup> and NH<sub>4</sub><sup>+</sup> concentrations measured with 6-  
495 hour intervals. The N<sub>2</sub>O production rate was measured after steady state was established by closing  
496 the gas inlet and outlet of the reactor and monitoring linear N<sub>2</sub>O production.

497

498 **Analytical methods.** The concentrations of  $\text{NH}_4^+$ ,  $\text{NO}_2^-$ , and  $\text{NO}_3^-$  were determined calorimetrically.  
499 Upon each sampling event, 1-mL sample was extracted with a disposable syringe and the cell-free  
500 supernatant was subjected to spectrophotometric assays. The  $\text{NH}_4^+$ -N concentration was measured  
501 using the salicylate method and the  $\text{NO}_2^-$ -N and/or  $\text{NO}_3^-$ -N concentrations were determined using the  
502 Griess method (33, 63). Headspace  $\text{N}_2\text{O}$  concentrations were determined using a HP 6890 series gas  
503 chromatograph equipped with a HP-PLOT Q column and a  $^{63}\text{Ni}$  electron capture detector (Agilent  
504 Technologies, Santa Clara, CA)(64). Helium ( $\geq 99.999\%$ , Special Gas Inc., Daejeon, Korea) and  $\text{CH}_4$   
505 (5%)/ Ar (95%) mixed gas were used as the carrier gas and the make-up gas, respectively. The  
506 injector, oven and detector temperature were set to 200, 85, 250°C, respectively. Assuming  
507 equilibrium between the aqueous and gas phases, the total amounts of  $\text{N}_2\text{O}$ -N in reaction vessels were  
508 calculated using the dimensionless Henry's law constant of 1.68 at 25°C (65). The concentrations of  
509 glucose, lactate and acetate were measured using a Prominence high-performance liquid  
510 chromatograph (Shimadzu, Kyoto, Japan) equipped with an Aminex<sup>®</sup> HPX-87H column (Bio-Rad  
511 Laboratories, Inc., Hercules, CA). Protein concentrations were determined with the Quick Start<sup>™</sup>  
512 Bradford Protein Assay kit (Bio-Rad Laboratories, Hercules, CA) using a concentration series of  
513 bovine serum albumin solution as standards.

514

515 **Statistical analysis.** With the exception of the chemostat experiments, all incubation experiments  
516 were performed in triplicates and the data presented as the averages of the triplicate samples along  
517 with their standard deviations. Statistical analyses were performed using the R software v.3.6.3  
518 ([www.r-project.org](http://www.r-project.org)), where one-sample Student's *t*-tests determined statistical significance of  
519 temporal changes in transcript copy numbers or N species concentrations. A *p*-value threshold of 0.05  
520 was applied.

521

## 522 **Acknowledgement**

523 This work was supported by the National Research Foundation of Korea (2020R1C1C1007970) and  
524 USDA-NIFA grant (2014-67019-21614). The authors were also financially supported by the Brain  
525 Korea 21 Plus Project (21A20132000003).

526

527 **Reference**

- 528 1. Williams AG, Audsley E, Sandars DL. 2010. Environmental burdens of producing bread wheat,  
529 oilseed rape and potatoes in England and Wales using simulation and system modelling. *Int J Life*  
530 *Cycle Ass* 15:855-868. <https://doi.org/10.1007/s11367-010-0212-3>.
- 531 2. Erisman JW, Sutton MA, Galloway J, Klimont Z, Winiwarter W. 2008. How a century of  
532 ammonia synthesis changed the world. *Nat Geosci* 1:636-639. <https://doi.org/10.1038/ngeo325>.
- 533 3. Erisman JW, Galloway JN, Seitzinger S, Bleeker A, Dise NB, Petrescu AMR, Leach AM, de  
534 Vries W. 2013. Consequences of human modification of the global nitrogen cycle. *Philos Trans R*  
535 *Soc B Biol Sci* 368:20130116. <https://doi.org/10.1098/rstb.2013.0116>.
- 536 4. Rockström J, Steffen W, Noone K, Persson Å, Chapin III FS, Lambin EF, Lenton TM, Scheffer  
537 M, Folke C, Schellnhuber HJ, Nykvist B, de Wit CA, Hughes T, van der Leeuw S, Rodhe H,  
538 Sörlin S, Snyder PK, Costanza R, Svedin U, Falkenmark M, Karlberg L, Corell RW, Fabry VJ,  
539 Hansen J, Walker B, Liverman D, Richardson K, Crutzen P, Foley JA. 2009. A safe operating  
540 space for humanity. *Nature* 461:472-475. <https://doi.org/10.1038/461472a>.
- 541 5. Canfield DE, Glazer AN, Falkowski PG. 2010. The evolution and future of earth's nitrogen cycle.  
542 *Science* 330:192-196. <https://doi.org/10.1126/science.1186120>.
- 543 6. Chen D, Suter HC, Islam A, Edis R. 2010. Influence of nitrification inhibitors on nitrification and  
544 nitrous oxide (N<sub>2</sub>O) emission from a clay loam soil fertilized with urea. *Soil Biol Biochem*.  
545 42:660-664. <https://doi.org/10.1016/j.soilbio.2009.12.014>.
- 546 7. Akiyama H, Yan X, Yagi K. 2010. Evaluation of effectiveness of enhanced-efficiency fertilizers  
547 as mitigation options for N<sub>2</sub>O and NO emissions from agricultural soils: meta-analysis. *Glob*  
548 *Change Biol* 16:1837-1846. <https://doi.org/10.1111/j.1365-2486.2009.02031.x>.
- 549 8. Putz M, Schleusner P, Rütting T, Hallin S. 2018. Relative abundance of denitrifying and DNRA  
550 bacteria and their activity determine nitrogen retention or loss in agricultural soil. *Soil Biol*  
551 *Biochem* 123:97-104. <https://doi.org/10.1016/j.soilbio.2018.05.006>.

- 552 9. Yoon S, Song B, Phillips RL, Chang J, Song MJ. 2019. Ecological and physiological implications  
553 of nitrogen oxide reduction pathways on greenhouse gas emissions in agroecosystems. FEMS  
554 Microbiol Ecol 95:fiz066 <https://doi.org/10.1093/femsec/fiz066>.
- 555 10. Friedl J, De Rosa D, Rowlings DW, Grace PR, Müller C, Scheer C. 2018. Dissimilatory nitrate  
556 reduction to ammonium (DNRA), not denitrification dominates nitrate reduction in subtropical  
557 pasture soils upon rewetting. Soil Biol Biochem 125:340-349.  
558 <https://doi.org/10.1016/j.soilbio.2018.07.024>.
- 559 11. Shan J, Zhao X, Sheng R, Xia Y, Ti C, Quan X, Wang S, Wei W, Yan X. 2016. Dissimilatory  
560 nitrate reduction processes in typical Chinese paddy soils: rates, relative contributions, and  
561 influencing factors. Environ Sci Technol 50:9972-9980. <https://doi.org/10.1021/acs.est.6b01765>.
- 562 12. Moreno-Vivián C, Flores E. 2007. Nitrate assimilation in bacteria. In Bothe H, Ferguson SJ,  
563 Newton WE (eds.), Biology of the Nitrogen Cycle. pp. 263-282. Elsevier B.V., Amsterdam,  
564 Netherlands. <https://doi.org/10.1016/B978-044452857-5.50018-7>.
- 565 13. van den Berg EM, Elisário MP, Kuenen JG, Kleerebezem R, van Loosdrecht MCM. 2017.  
566 Fermentative bacteria influence the competition between denitrifiers and DNRA bacteria. Front  
567 Microbiol 8:1684. <https://doi.org/10.3389/fmicb.2017.01684>.
- 568 14. Bonin P. 1996. Anaerobic nitrate reduction to ammonium in two strains isolated from coastal  
569 marine sediment: a dissimilatory pathway. FEMS Microbiol Ecol 19:27-38.  
570 <https://doi.org/10.1111/j.1574-6941.1996.tb00195.x>.
- 571 15. Cruz-García C, Murray AE, Klappenbach JA, Stewart V, Tiedje JM. 2007. Respiratory nitrate  
572 ammonification by *Shewanella oneidensis* MR-1. J Bacteriol 189:656-662.  
573 <https://doi.org/10.1128/JB.01194-06>.
- 574 16. Pandey A, Suter H, He J-Z, Hu H-W, Chen D. 2018. Nitrogen addition decreases dissimilatory  
575 nitrate reduction to ammonium in rice paddies. Appl Environ Microbiol 84:e00870-18.  
576 <https://doi.org/10.1128/AEM.00870-18>.
- 577 17. Yoon S, Cruz-García C, Sanford R, Ritalahti KM, Löffler FE. 2015. Denitrification versus  
578 respiratory ammonification: environmental controls of two competing dissimilatory  $\text{NO}_3^-/\text{NO}_2^-$

- 579 reduction pathways in *Shewanella loihica* strain PV-4. ISME J 9:1093-1104.  
580 <https://doi.org/10.1038/ismej.2014.201>.
- 581 18. Laverman AM, Van Cappellen P, van Rotterdam-Los D, Pallud C, Abell J. 2006. Potential rates  
582 and pathways of microbial nitrate reduction in coastal sediments. FEMS Microbiol Ecol 58:179-  
583 192. <https://doi.org/10.1111/j.1574-6941.2006.00155.x>.
- 584 19. Schmidt CS, Richardson DJ, Baggs EM. 2011. Constraining the conditions conducive to  
585 dissimilatory nitrate reduction to ammonium in temperate arable soils. Soil Biol Biochem  
586 43:1607-1611. <https://doi.org/10.1016/j.soilbio.2011.02.015>.
- 587 20. Hardison AK, Algar CK, Giblin AE, Rich JJ. 2015. Influence of organic carbon and nitrate  
588 loading on partitioning between dissimilatory nitrate reduction to ammonium (DNRA) and N<sub>2</sub>  
589 production. Geochim. Cosmochim. Acta 164:146-160. <https://doi.org/10.1016/j.gca.2015.04.049>.
- 590 21. van den Berg EM, van Dongen U, Abbas B, van Loosdrecht MCM. 2015. Enrichment of DNRA  
591 bacteria in a continuous culture. ISME J. 9:2153-2161. <https://doi.org/10.1038/ismej.2015.26>.
- 592 22. van den Berg EM, Boleij M, Kuenen JG, Kleerebezem R, van Loosdrecht MCM. 2016. DNRA  
593 and denitrification coexist over a broad range of acetate/N-NO<sub>3</sub><sup>-</sup> ratios, in a chemostat enrichment  
594 culture. Front Microbiol 7:1842-1853. <https://doi.org/10.3389/fmicb.2016.01842>.
- 595 23. Vuono DC, Read RW, Hemp J, Sullivan BW, Arnone JA, Neveux I, Blank RR, Loney E, Miceli  
596 D, Winkler MKH, Chakraborty R, Stahl DA, Grzymiski JJ. 2019. Resource concentration  
597 modulates the fate of dissimilated nitrogen in a dual-pathway *Actinobacterium*. Front Microbiol  
598 10:3. <https://doi.org/10.3389/fmicb.2019.00003>.
- 599 24. Welsh A, Chee-Sanford JC, Connor LM, Löffler FE, Sanford RA. 2014. Refined NrfA phylogeny  
600 improves PCR-based *nrfA* gene detection. Appl Environ Microbiol 80:2110-2119.  
601 <https://doi.org/10.1128/AEM.03443-13>.
- 602 25. Orellana LH, Chee-Sanford JC, Sanford RA, Löffler FE, Konstantinidis KT. 2017. Year-round  
603 shotgun metagenomes reveal stable microbial communities in agricultural soils and novel  
604 ammonia oxidizers responding to fertilization. Appl Environ Microbiol 84:e01646-17.  
605 <https://doi.org/10.1128/AEM.01646-17>.

- 606 26. Rocca JD, Hall EK, Lennon JT, Evans SE, Waldrop MP, Cotner JB, Nemergut DR, Graham EB,  
607 Wallenstein MD. 2014. Relationships between protein-encoding gene abundance and  
608 corresponding process are commonly assumed yet rarely observed. *ISME J* 9:1693-1699.  
609 <https://doi.org/10.1038/ismej.2014.252>.
- 610 27. Decleyre H, Heylen K, Colen C, Willems A. 2015. Dissimilatory nitrogen reduction in intertidal  
611 sediments of a temperate estuary: small scale heterogeneity and novel nitrate-to-ammonium  
612 reducers. *Front Microbiol* 6:1124. <https://doi.org/10.3389/fmicb.2015.01124>.
- 613 28. Stremińska MA, Felgate H, Rowley G, Richardson DJ, Baggs EM. 2012. Nitrous oxide  
614 production in soil isolates of nitrate-ammonifying bacteria. *Environ Microbiol Rep* 4:66-71.  
615 <https://doi.org/10.1111/j.1758-2229.2011.00302.x>.
- 616 29. Heylen K, Keltjens J. 2012. Redundancy and modularity in membrane-associated dissimilatory  
617 nitrate reduction in *Bacillus*. *Front Microbiol* 3:371. <https://doi.org/10.3389/fmicb.2012.00371>.
- 618 30. Sun Y, De Vos P, Willems A. 2018. Influence of nitrate and nitrite concentration on N<sub>2</sub>O  
619 production via dissimilatory nitrate/nitrite reduction to ammonium in *Bacillus paralicheniformis*  
620 LMG 6934. *MicrobiologyOpen* 7:e00592. <https://doi.org/10.1002/mbo3.592>.
- 621 31. Sanford RA, Cole JR, Tiedje JM. 2002. Characterization and description of *Anaeromyxobacter*  
622 *dehalogenans* gen. nov., sp. nov., an aryl-halorespiring facultative anaerobic *Myxobacterium*.  
623 *Appl Environ. Microbiol.* 68:893-900. <https://doi.org/10.1128/AEM.68.2.893-900.2002>.
- 624 32. Mania D, Heylen K, Spanning RJ, Frostegård Å. 2014. The nitrate-ammonifying and *nosZ*  
625 carrying bacterium *Bacillus vireti* is a potent source and sink for nitric and nitrous oxides under  
626 high nitrate conditions. *Environ Microbiol.* 16:3196-3210. <https://doi.org/10.1111/1462-2920.12478>.
- 628 33. Baethgen WE, Alley MM. 1989. A manual colorimetric procedure for measuring ammonium  
629 nitrogen in soil and plant Kjeldahl digests. *Comm Soil Sci Plant Anal* 20:961-969.  
630 <https://doi.org/10.1080/00103628909368129>.
- 631 34. Wang H, Gunsalus RP. 2000. The *nrfA* and *nirB* nitrite reductase operons in *Escherichia coli* are  
632 expressed differently in response to nitrate than to nitrite. *J Bacteriol* 182:5813-5822.  
633 <https://doi.org/10.1128/jb.182.20.5813-5822.2000>.

- 634 35. Mania D, Heylen K, van Spanning RJM, Frostegård Å. 2016. Regulation of nitrogen metabolism  
635 in the nitrate-ammonifying soil bacterium *Bacillus vireti* and evidence for its ability to grow using  
636 N<sub>2</sub>O as electron acceptor. *Environ Microbiol* 18:2937-2950. [https://doi.org/10.1111/1462-](https://doi.org/10.1111/1462-2920.13124)  
637 [2920.13124](https://doi.org/10.1111/1462-2920.13124).
- 638 36. Tiedje JM, Sextstone AJ, Myrold DD, Robinson JA. 1983. Denitrification: ecological niches,  
639 competition and survival. *Antonie van Leeuwenhoek* 48:569-583.  
640 <https://doi.org/10.1007/bf00399542>.
- 641 37. Zumft WG. 1997. Cell biology and molecular basis of denitrification. *Microbiol Mol Biol Rev*  
642 61:533-616.
- 643 38. Burgin AJ, Hamilton SK. 2007. Have we overemphasized the role of denitrification in aquatic  
644 ecosystems? A review of nitrate removal pathways. *Front Ecol Environ* 5:89-96.  
645 [https://doi.org/10.1890/1540-9295\(2007\)5\[89:HWOTRO\]2.0.CO;2](https://doi.org/10.1890/1540-9295(2007)5[89:HWOTRO]2.0.CO;2).
- 646 39. Pandey A, Suter H, He J-Z, Hu H-W, Chen D. 2019. Dissimilatory nitrate reduction to  
647 ammonium dominates nitrate reduction in long-term low nitrogen fertilized rice paddies. *Soil Biol*  
648 *Biochem.* 131:149-156. <https://doi.org/10.1016/j.soilbio.2019.01.007>.
- 649 40. Dalsgaard T, Bak F. 1994. Nitrate reduction in a sulfate-reducing bacterium, *Desulfovibrio*  
650 *desulfuricans*, isolated from rice paddy soil: sulfide inhibition, kinetics, and regulation. *Appl*  
651 *Environ Microbiol* 60:291-297.
- 652 41. Smith MS. 1982. Dissimilatory reduction of NO<sub>2</sub><sup>-</sup> to NH<sub>4</sub><sup>+</sup> and N<sub>2</sub>O by a Soil *Citrobacter* sp.  
653 *Appl Environ Microbiol* 43:854-860.
- 654 42. Stremínska MA, Felgate H, Rowley G, Richardson DJ, Baggs EM. 2012. Nitrous oxide  
655 production in soil isolates of nitrate-ammonifying bacteria. *Environ Microbiol Rep* 4:66-71.  
656 <https://doi.org/10.1111/j.1758-2229.2011.00302.x>.
- 657 43. Sung Y, Fletcher KE, Ritalahti KM, Apkarian RP, Ramos-Hernández N, Sanford RA, Mesbah  
658 NM, Löffler FE. 2006. *Geobacter lovleyi* sp. nov. strain SZ, a novel metal-reducing and  
659 tetrachloroethene-dechlorinating bacterium. *Appl Environ Microbiol* 72:2775-2782.  
660 <https://doi.org/10.1128/AEM.72.4.2775-2782.2006>.



- 661 44. Sun Y, De Vos P, Heylen K. 2016. Nitrous oxide emission by the non-denitrifying, nitrate  
662 ammonifier *Bacillus licheniformis*. BMC Genom. 17:1-11. [https://doi.org/10.1186/s12864-016-](https://doi.org/10.1186/s12864-016-2382-2)  
663 [2382-2](https://doi.org/10.1186/s12864-016-2382-2).
- 664 45. Qu Z, Bakken LR, Molstad L, Frostegård Å, Bergaust LL. 2016. Transcriptional and metabolic  
665 regulation of denitrification in *Paracoccus denitrificans* allows low but significant activity of  
666 nitrous oxide reductase under oxic conditions. Environ Microbiol 18:2951-2963.  
667 <https://doi.org/10.1111/1462-2920.13128>.
- 668 46. Chang J, Gu W, Park D, Semrau JD, DiSpirito AA, Yoon S. 2018. Methanobactin from  
669 *Methylosinus trichosporium* OB3b inhibits N<sub>2</sub>O reduction in denitrifiers. ISME J. 12:2086-2089.  
670 <https://doi.org/10.1038/s41396-017-0022-8>.
- 671 47. Felgate H, Giannopoulos G, Sullivan MJ, Gates AJ, Clarke TA, Baggs E, Rowley G, Richardson  
672 DJ. 2012. The impact of copper, nitrate and carbon status on the emission of nitrous oxide by two  
673 species of bacteria with biochemically distinct denitrification pathways. Environ Microbiol  
674 14:1788-1800. <https://doi.org/10.1111/j.1462-2920.2012.02789.x>.
- 675 48. Liu B, Mao Y, Bergaust L, Bakken LR, Frostegard A. 2013. Strains in the genus *Thauera* exhibit  
676 remarkably different denitrification regulatory phenotypes. Environ Microbiol 15:2816-2828.  
677 <https://doi.org/10.1111/1462-2920.12142>.
- 678 49. Bengtsson G, Bengtson P, Månsson KF. 2003. Gross nitrogen mineralization-, immobilization-,  
679 and nitrification rates as a function of soil C/N ratio and microbial activity. Soil Biol Biochem  
680 35:143-154. [https://doi.org/10.1016/S0038-0717\(02\)00248-1](https://doi.org/10.1016/S0038-0717(02)00248-1).
- 681 50. Luckmann M, Mania D, Kern M, Bakken LR, Frostegård Å, Simon J. 2014. Production and  
682 consumption of nitrous oxide in nitrate-ammonifying *Wolinella succinogenes* cells. Microbiology  
683 160:1749-1759. <https://doi.org/10.1099/mic.0.079293-0>.
- 684 51. Corker H, Poole RK. 2003. Nitric oxide formation by *Escherichia coli*. Dependence on nitrite  
685 reductase, the NO-sensing regulator Fnr, and flavohemoglobin Hmp. J Biol Chem 278:31584-  
686 31592. <https://doi.org/10.1074/jbc.M303282200>.
- 687 52. Wolin EA, Wolin MJ, Wolfe RS. 1963. Formation of methane by bacterial extracts. J Biol Chem  
688 238:2882-2886.

- 689 53. Rehr B, Klemme J-H. 1989. Competition for nitrate between denitrifying *Pseudomonas stutzeri*  
690 and nitrate ammonifying enterobacteria. FEMS Microbiol Lett 62:51-57.  
691 [https://doi.org/10.1016/0378-1097\(89\)90105-5](https://doi.org/10.1016/0378-1097(89)90105-5).
- 692 54. Akunna JC, Bizeau C, Moletta R. 1993. Nitrate and nitrite reductions with anaerobic sludge using  
693 various carbon sources: glucose, glycerol, acetic acid, lactic acid and methanol. Water Res  
694 27:1303-1312. [https://doi.org/10.1016/0043-1354\(93\)90217-6](https://doi.org/10.1016/0043-1354(93)90217-6).
- 695 55. Garcia-Robledo E, Corzo A, Papaspyrou S. 2014. A fast and direct spectrophotometric method  
696 for the sequential determination of nitrate and nitrite at low concentrations in small volumes. Mar  
697 Chem 162:30-36. <https://doi.org/10.1016/j.marchem.2014.03.002>.
- 698 56. Yoshinari T, Hynes R, Knowles R. 1977. Acetylene inhibition of nitrous oxide reduction and  
699 measurement of denitrification and nitrogen fixation in soil. Soil Biol Biochem 9:177-183.
- 700 57. Martin M. 2011. Cutadapt removes adapter sequences from high-sequencing reads. EMBnet J  
701 17:10-12. <https://doi.org/10.14806/ej.17.1.200>.
- 702 58. Bankevich A, Nurk S, Antipov D, Gurevich AA, Dvorkin M, Kulikov AS, Lesin VM, Nikolenko  
703 SI, Pham S, Prjibelski AD, Pyshkin AV, Sirotkin AV, Vyahhi N, Tesler G, Alekseyev MA,  
704 Pevzner PA. 2012. SPAdes: a new genome assembly algorithm and its applications to single-cell  
705 sequencing. J Comput Biol 19:455-477. <https://doi.org/10.1089/cmb.2012.0021>.
- 706 59. Parks DH, Imelfort M, Skennerton CT, Hugenholtz P, Tyson GW. 2015. CheckM: assessing the  
707 quality of microbial genomes recovered from isolates, single cells, and metagenomes. Genome  
708 Res 25:1043-1055. <https://doi.org/10.1101/gr.186072.114>.
- 709 60. Tatusova T, DiCuccio M, Badretdin A, Chetvernin V, Nawrocki EP, Zaslavsky L, Lomsadze A,  
710 Pruitt KD, Borodovsky M, Ostell J. 2016. NCBI prokaryotic genome annotation pipeline. Nucleic  
711 Acids Res 44:6614-6624. <https://doi.org/10.1093/nar/gkw569>.
- 712 61. Fish J, Chai B, Wang Q, Sun Y, Brown CT, Tiedje J, Cole J. 2013. FunGene: the functional gene  
713 pipeline and repository. Front Microbiol 4:291 <https://doi.org/10.3389/fmicb.2013.00291>.
- 714 62. Maalej S, Denis M, Dukan S. 2004. Temperature and growth-phase effects on *Aeromonas*  
715 hydrophila survival in natural seawater microcosms: role of protein synthesis and nucleic acid

- 716 content on viable but temporarily nonculturable response. *Microbiology* 150:181-187.  
717 <https://doi.org/10.1099/mic.0.26639-0>.
- 718 63. Miranda KM, Espey MG, Wink DA. 2001. A rapid, simple spectrophotometric method for  
719 simultaneous detection of nitrate and nitrite. *Nitric Oxide* 5:62-71.  
720 <https://doi.org/10.1006/niox.2000.0319>.
- 721 64. Park D, Kim H, Yoon S. 2017. Nitrous oxide reduction by an obligate aerobic bacterium  
722 *Gemmatimonas aurantiaca* strain T-27. *Appl Environ Microbiol* 83:e00502-17.  
723 <https://doi.org/10.1128/AEM.00502-17>.
- 724 65. Sander R. 2015. Compilation of Henry's law constants (version 4.0) for water as solvent. *Atmos*  
725 *Chem Phys* 15:4399-4981. <https://doi.org/10.5194/acp-15-4399-2015>.
- 726  
727  
728  
729  
730  
731  
732  
733  
734  
735  
736  
737  
738  
739  
740  
741  
742  
743

744 **Figures**

745

| Isolates                      | Denitrification and DNRA                                              |             | Denitrification                             |             |                                             | DNRA                                                                  |             | NO reduction and detoxification |             |            | Sensors and regulators                                            |             |                                                                               |             |
|-------------------------------|-----------------------------------------------------------------------|-------------|---------------------------------------------|-------------|---------------------------------------------|-----------------------------------------------------------------------|-------------|---------------------------------|-------------|------------|-------------------------------------------------------------------|-------------|-------------------------------------------------------------------------------|-------------|
|                               | NO <sub>3</sub> <sup>-</sup> → NO <sub>2</sub> <sup>-</sup> reduction |             | NO <sub>2</sub> <sup>-</sup> → NO reduction |             | N <sub>2</sub> O → N <sub>2</sub> reduction | NO <sub>2</sub> <sup>-</sup> → NH <sub>4</sub> <sup>+</sup> reduction |             | NO → N <sub>2</sub> O reduction |             |            | NO <sub>3</sub> <sup>-</sup> /NO <sub>2</sub> <sup>-</sup> sensor |             | NO <sub>3</sub> <sup>-</sup> /NO <sub>2</sub> <sup>-</sup> response regulator |             |
|                               | <i>napA</i>                                                           | <i>narG</i> | <i>nirK</i>                                 | <i>nirS</i> | <i>nosZ</i>                                 | <i>nirB</i>                                                           | <i>nrfA</i> | <i>norB</i>                     | <i>norV</i> | <i>hmp</i> | <i>narQ</i>                                                       | <i>narX</i> | <i>narL</i>                                                                   | <i>narP</i> |
| <i>Aeromonas</i> sp. DNRA1    | ■                                                                     |             |                                             |             |                                             | ■                                                                     | ■           |                                 |             | ■          | ■                                                                 |             | ■                                                                             |             |
| <i>Bacillus</i> sp. DNRA2     | ■                                                                     |             |                                             |             | ■                                           |                                                                       | ■           | ■                               |             | ■          | ■                                                                 |             | ■                                                                             |             |
| <i>Citrobacter</i> sp. DNRA3  | ■                                                                     | ■           |                                             |             |                                             | ■                                                                     | ■           |                                 | ■           | ■          | ■                                                                 | ■           | ■                                                                             | ■           |
| <i>Shewanella</i> sp. DNRA4   | ■                                                                     |             |                                             |             |                                             |                                                                       | ■           | ■                               |             |            | ■                                                                 |             | ■                                                                             |             |
| <i>Enterobacter</i> sp. DNRA5 | ■                                                                     | ■           |                                             |             |                                             | ■                                                                     |             |                                 | ■           | ■          | ■                                                                 | ■           | ■                                                                             |             |
| <i>Klebsiella</i> sp. DNRA6   | ■                                                                     | ■           |                                             |             |                                             | ■                                                                     |             |                                 | ■           | ■          |                                                                   | ■           | ■                                                                             |             |

746

747 **Fig. 1.** Functional genes identified in the draft genomes of the six DNRA bacteria that are potentially  
 748 relevant to turnover of reactive nitrogen species or regulation of dissilatory nitrogen metabolism. The  
 749 genes that were recovered in the draft genome are represented as shaded boxes.

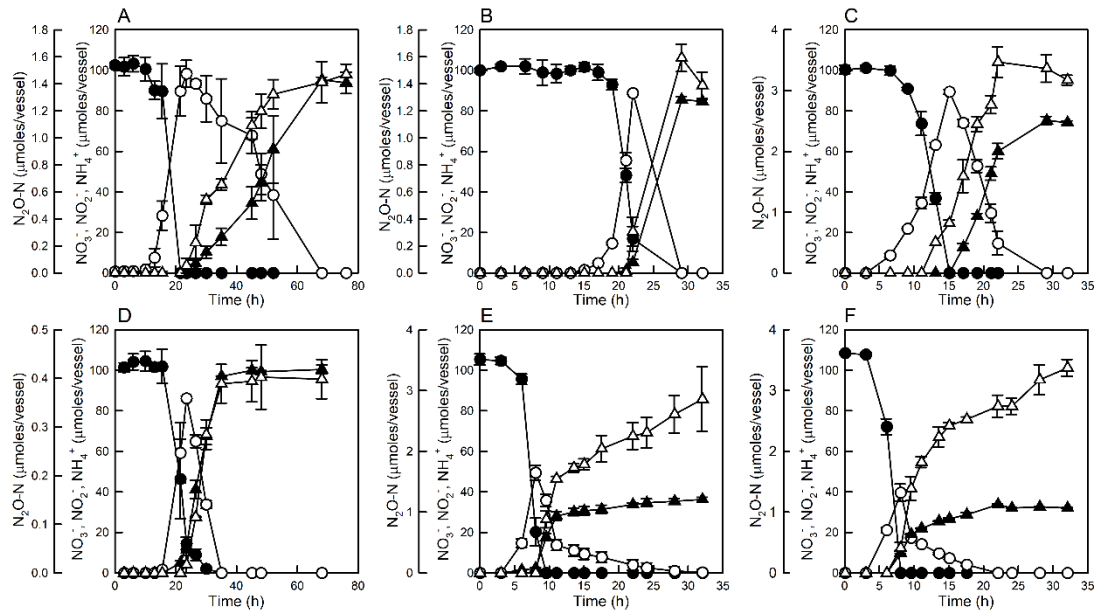

750

751 **Fig. 2.**  $\text{NO}_3^-$  reduction monitored in 100-mL batch cultures (prepared in sealed 160-mL serum bottles  
752 with headspace consisting of 90%  $\text{N}_2$  and 10%  $\text{C}_2\text{H}_2$ ) of (A) *Aeromonas* sp. DNRA1, (B) *Bacillus* sp.  
753 DNRA2, (C) *Citrobacter* sp. DNRA3, (D) *Shewanella* sp. DNRA4, (E) *Enterobacter* sp. DNRA5, and  
754 (F) *Klebsiella* sp. DNRA6. The averages of biological replicates ( $n=3$ ) are presented with the error  
755 bars representing their standard deviations ( $\text{NO}_3^-$ : ●,  $\text{NO}_2^-$ : ○,  $\text{NH}_4^+$ : ▲,  $\text{N}_2\text{O-N}$ : △)

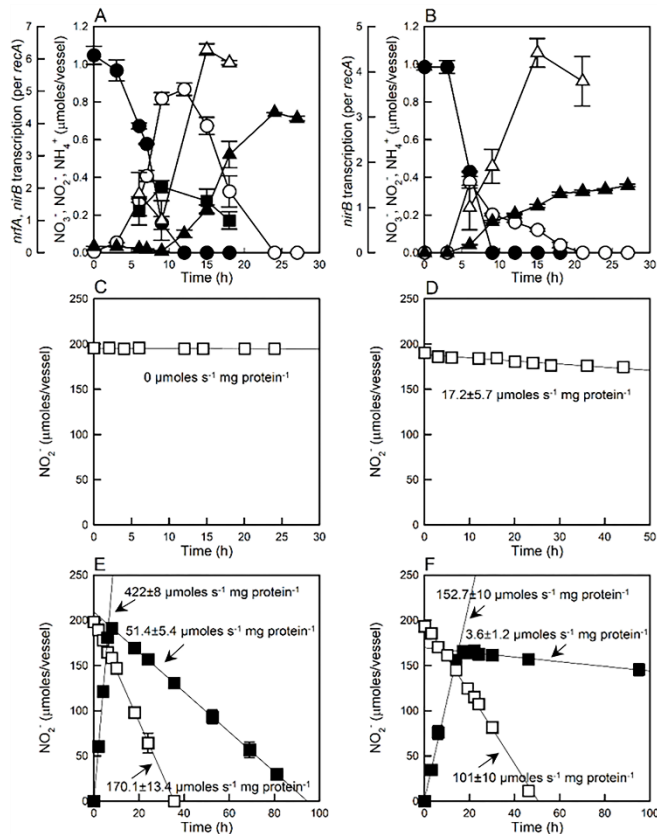

756

757 **Fig. 3.** Transcription of (A) *nrfA* and *nirB* in *Citrobacter* sp. DNRA2 and (B) *nirB* in *Enterobacter* sp.

758 DNRA5 cells as 1 mM NO<sub>3</sub><sup>-</sup> (●) was reduced to NH<sub>4</sub><sup>+</sup> (▲) via NO<sub>2</sub><sup>-</sup> (○). Changes to the amounts of

759 NO<sub>2</sub><sup>-</sup> were monitored in the chloramphenicol-treated resting cultures of *Citrobacter* sp. DNRA2 (C,

760 E) and *Enterobacter* sp. DNRA5 (D, F) harvested before (C, D) and after (E, F) NO<sub>3</sub><sup>-</sup> depletion and

761 resuspended in fresh medium containing 2 mM NO<sub>2</sub><sup>-</sup> (□) or 2 mM NO<sub>3</sub><sup>-</sup> (■). All experiments were

762 performed in biological replicates (*n*=3) and the error bars represent the standard deviations

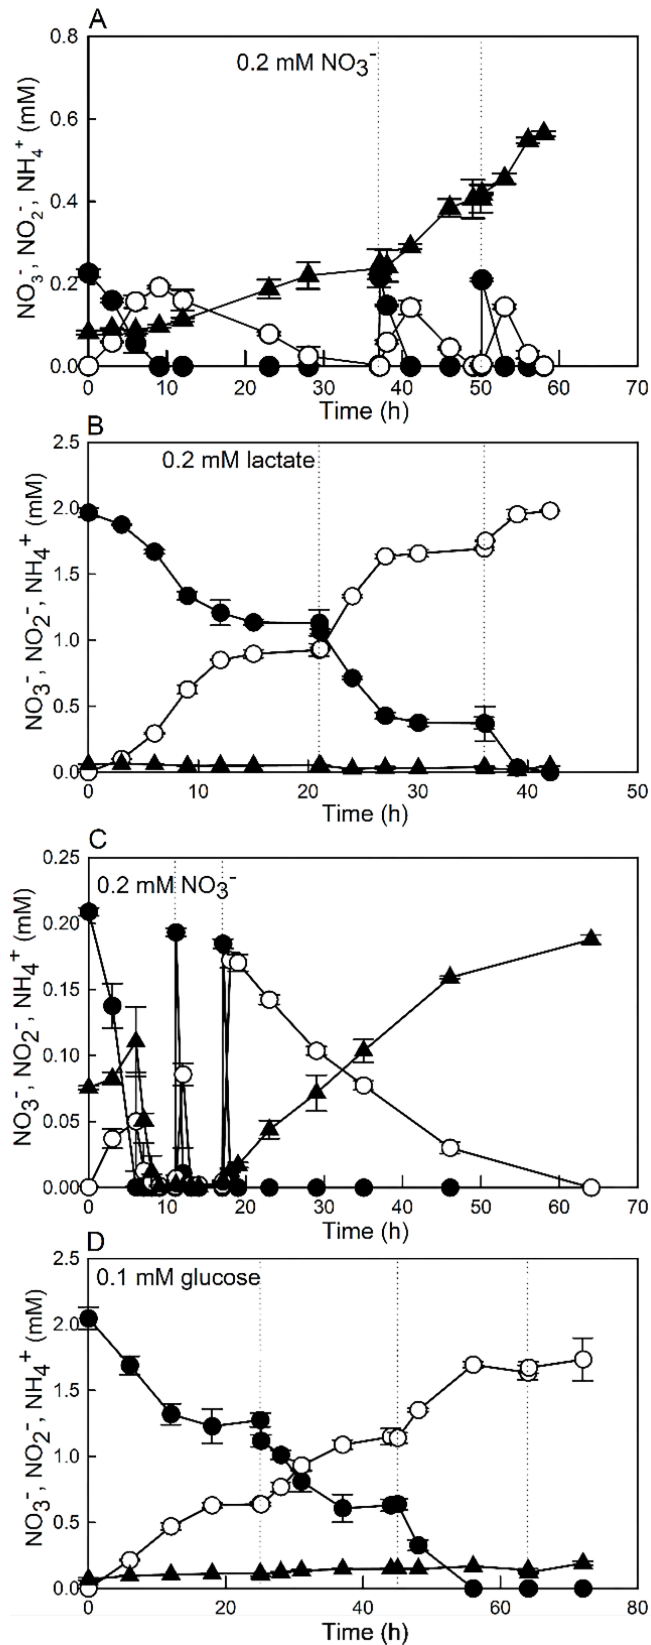

763

764 **Fig. 4.**  $\text{NO}_3^-$  reduction observed with batch cultures of *Citrobacter* sp. DNRA2 (A, B) and  
765 *Enterobacter* sp. DNRA5 (C, D) prepared with two different initial C-to-N ratios. The high C-to-N  
766 conditions were prepared with 0.2 mM  $\text{NO}_3^-$  and 5 mM lactate (A) or 2.5 mM glucose (C), and  $\text{NO}_3^-$

767 was replenished to 0.2 mM upon  $\text{NO}_3^-/\text{NO}_2^-$  depletion. The low C-to-N conditions were prepared with  
768 2.0 mM  $\text{NO}_3^-$  and 0.2 mM lactate (B) or 0.1 mM glucose (D) and the carbon sources were replenished  
769 when  $\text{NO}_3^-/\text{NO}_2^-$  reduction stopped. The dotted lines denote the time points where the limiting  
770 nutrients were replenished. The averages of biological replicates ( $n=3$ ) are presented with the error  
771 bars representing their standard deviations ( $\text{NO}_3^-$ : ●,  $\text{NO}_2^-$ : ○,  $\text{NH}_4^+$ : ▲,  $\text{N}_2\text{O-N}$ : △)



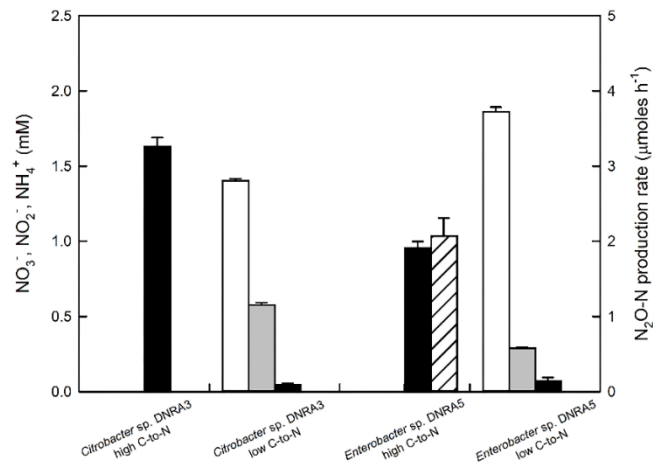

772

773 **Fig. 5.** Steady-state concentrations of  $\text{NO}_3^-$  (white),  $\text{NO}_2^-$  (gray), and  $\text{NH}_4^+$  (black) in the electron  
774 acceptor-limiting (high C-to-N ratio) and electron donor-limiting (low C-to-N ratio) chemostat  
775 cultures of *Citrobacter* sp. DNRA2 and *Enterobacter* sp. DNRA5.  $\text{N}_2\text{O-N}$  production rate (hatched) is  
776 also presented for *Enterobacter* sp. DNRA5 cultivated under the electron acceptor-limiting condition,  
777 which was the only reactor culture with observed  $\text{N}_2\text{O}$  production. The average values of the three  
778 measurements taken with six-hour intervals are presented with the error bars represent their standard  
779 deviations

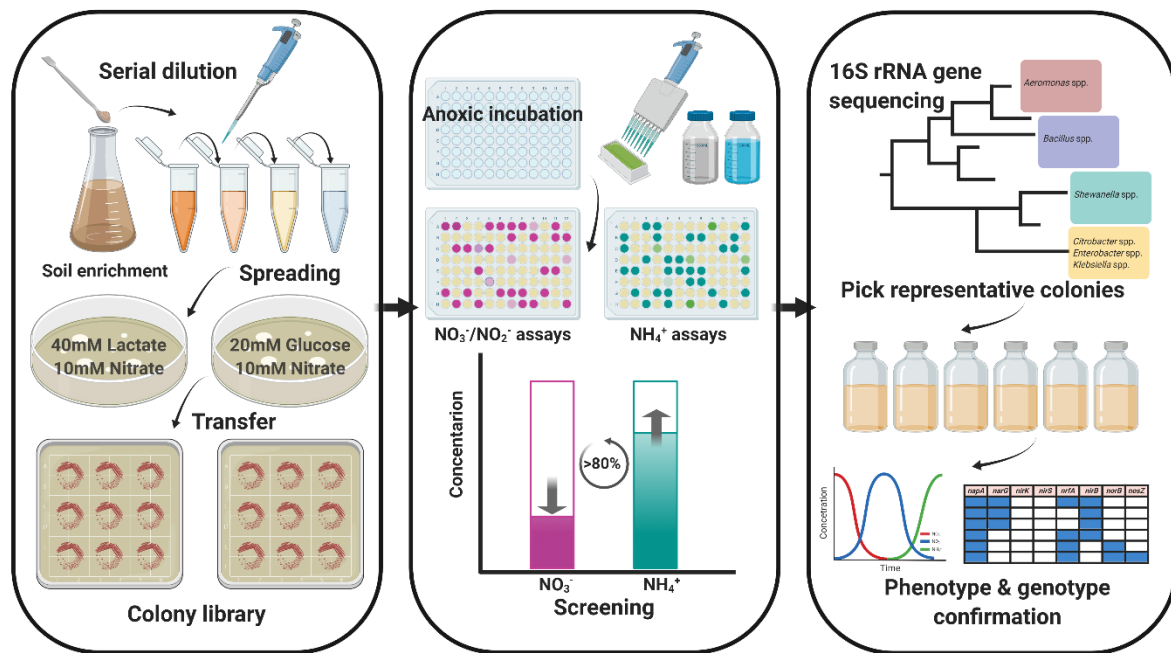

780

781 **Fig. 6.** The schematic overview of the high-throughput screening methods developed for isolation of

782 DNRA-catalyzing organisms from agricultural soil
